# Supplementary material
Source: ML conference proceedings conference paper supplement (https://proceedings.neurips.cc/paper_files/paper/2012/hash/1ee3dfcd8a0645a25a35977997223d22-Abstract.html)
Supplement: Supplementary file [file 1ee3dfcd8a0645a25a35977997223d22-Supplemental.zip]

# Supplementary Material for *Accelerated Training for Matrix-norm Regularization: A Boosting Approach*

## A Proof of Theorem 1

In this section we prove the  $O(1/\epsilon)$  convergence rate of the boosting Algorithm 1.

**Theorem 1 (Rate of convergence)** *Under Assumption 1, Algorithm 1 finds an  $\epsilon$  accurate solution to (5) in  $O(1/\epsilon)$  number of steps. More precisely, denoting  $f^*$  as the minimum of (5), then*

$$f(\{\sigma_i^{(k)}, A_i^{(k)}\}) - f^* \leq \frac{4C_L}{k+2}.$$

*Proof:* Denoting  $s^* = \sum_i \sigma_i^*$ , where recall that  $\{A_i^*, \sigma_i^*\}$  is some optimal solution to (5). Our proof is based upon the following observation:

$$\begin{aligned} f^* &= \min_{A_i \in \mathcal{A}, \sigma_i \geq 0} L\left(\sum_i \sigma_i A_i\right) + \lambda \sum_i \sigma_i \\ &= \min_{Y \in s^* \mathcal{K}} L(Y) + \lambda s^*, \end{aligned} \quad (19)$$

where  $\mathcal{K}$  is the convex hull of the set  $\mathcal{A}$ .

Let  $s_k := \sum_i \sigma_i^{(k)}$ . We prove Theorem 1 for a “weaker” version of Algorithm 1, where  $a_k$  is set to some constant  $1 - \eta_k$ . The following chain of inequalities consists the main part of our proof.

$$f(X_k) = L(X_k) + \lambda s_k$$

$$\text{(Definition of } X_k, s_k) = \min_{\rho \geq 0} L((1 - \eta_k)X_{k-1} + \rho \eta_k H_k) + \lambda(1 - \eta_k)s_{k-1} + \lambda \rho \eta_k \quad (20)$$

$$\leq L((1 - \eta_k)X_{k-1} + \eta_k(s^* H_k)) + \lambda(1 - \eta_k)s_{k-1} + \lambda s^* \eta_k$$

$$\text{(Assumption 1)} \leq f(X_{k-1}) + \eta_k \langle s^* H_k - X_{k-1}, \nabla L(X_{k-1}) \rangle + \frac{C_L}{2} \eta_k^2 - \lambda \eta_k s_{k-1} + \lambda \eta_k s^* \quad (21)$$

$$\text{(Definition of } H_k) \leq \min_{Y \in s^* \mathcal{A}} f(X_{k-1}) + \eta_k \langle Y - X_{k-1}, \nabla L(X_{k-1}) \rangle + \frac{C_L}{2} \eta_k^2 - \lambda \eta_k s_{k-1} + \lambda \eta_k s^*$$

$$\text{(Linearity)} \leq \min_{Y \in s^* \mathcal{K}} f(X_{k-1}) + \eta_k \langle Y - X_{k-1}, \nabla L(X_{k-1}) \rangle + \frac{C_L}{2} \eta_k^2 - \lambda \eta_k s_{k-1} + \lambda \eta_k s^* \quad (22)$$

$$\text{(Convexity of } L) \leq \min_{Y \in s^* \mathcal{K}} f(X_{k-1}) + \eta_k (L(Y) - L(X_{k-1})) + \frac{C_L}{2} \eta_k^2 - \lambda \eta_k s_{k-1} + \lambda \eta_k s^*$$

$$\text{(Rearrangement)} = (1 - \eta_k)f(X_{k-1}) + \eta_k \min_{Y \in s^* \mathcal{K}} (L(Y) + \lambda s^*) + \frac{C_L}{2} \eta_k^2$$

$$\text{(Observation (19))} = (1 - \eta_k)f(X_{k-1}) + \eta_k f^* + \frac{C_L}{2} \eta_k^2,$$

hence

$$f(X_k) - f^* \leq (1 - \eta_k)(f(X_{k-1}) - f^*) + \frac{C_L}{2} \eta_k^2.$$

Setting  $\eta_k = \frac{2}{k+2}$ , and an easy induction argument establishes that

$$f(X_k) - f^* \leq \frac{4C_L}{k+2}.$$

■

The proof, although completely elementary, does harness several interesting ideas. Note first that in, say, the analysis of the ordinary gradient algorithm, one usually upper bounds the convex function  $L$  by its quadratic expansion

$$L(Y) \leq L(X) + \langle Y - X, \nabla L(X) \rangle + \frac{\hat{C}_L}{2} \|Y - X\|^2,$$

and then tries to minimize the quadratic upper bound; while in contrast, our analysis above takes perhaps a surprisingly loose step: upper bound  $L$  by the *linear* function

$$L(y) \leq L(x) + \langle Y - X, \nabla L(X) \rangle + \frac{C_L}{2}.$$

The (huge) gain, of course, is the possibility of inequality (22), which allows us to select the next update by optimizing over the (potentially much simpler) set  $\mathcal{A}$ , instead of the convex hull  $\mathcal{K}$ .

The next key ingredient in the proof is our observation (19), which is completely trivial, yet after combining it with the one dimensional line search over  $\rho \geq 0$  (or  $b$  in Algorithm 1), Algorithm 1 behaves as if it knew the *unknown* but fixed constant  $s^*$ .

Some remarks regarding to Theorem 1 are in order.

- If the loss function  $L$  is only Lipchitz continuous, then one can apply the “smoothing” trick [35] to get  $O(\frac{1}{\epsilon^2})$  convergence rate for algorithm 1.
- Our result heavily builds on previous work [10, 18], however, it seems that our treatment is slightly more general. For instance, the  $\ell_1$  norm regularizer  $\sum_i \sigma_i$  can be readily replaced by  $h(\sum_i \sigma_i)$ , where  $h : \mathbb{R}_+ \rightarrow \mathbb{R}$  is some convex function. Essentially the same proof would still go through. Take  $h$  as the indicator of some convex set recovers most previous results, which all consider the constrained problem instead of the arguably more natural regularized problem<sup>6</sup>.
- The line search step in Algorithm 1 need not be solved exactly. We can derive essentially the same rate as long as the error decays at the rate  $O(\frac{1}{k})$ .
- The step size  $\eta_k = O(\frac{1}{k})$  is optimal, among constant ones, in the following sense. We usually prefer large step sizes since they often than not result in faster convergence; on the other hand, Algorithm 1 needs to be able to reset any  $\sigma_i$  to 0, which requires that the discount factor  $\prod_{k=1}^{\infty} (1 - \eta_k) = 0$ . It is not hard to show that the latter condition is satisfied iff  $\sum_{k=1}^{\infty} \eta_k = \infty$ , hence the near optimality of the step size  $O(\frac{1}{k})$ .

## B Improved Rate When $L$ is Strongly Convex

In this section, under an additional assumption, we improve the convergence rate in Theorem 1 by considering the totally corrective algorithm in (7).

Recall that strong convexity (with modulus  $\mu$ ) of  $L$  implies that

$$L(Y) \geq L(X) + \langle Y - X, \nabla L(X) \rangle + \frac{\mu}{2} \|L - X\|^2. \quad (23)$$

Note that the constant  $\mu$  depends on the choice of the norm  $\|\cdot\|$ . In the proof we fix the norm to be essentially  $\ell_1$ , and we assume the set  $\mathcal{A}$  consists of finitely many points.

**Theorem 2** *Suppose Assumption 1 holds and  $L$  is furthermore strongly convex with modulus  $\mu$ . Let  $\{A_i^*, \sigma_i^*\}$  be a minimizer of (5) and denote  $f^* := f(\{A_i^*, \sigma_i^*\})$ ,  $s^* := \sum_i \sigma_i^*$ . Then the totally corrective algorithm converges at least linearly. More precisely*

$$f(\{\sigma_i^{(k)}, A_i^{(k)}\}) - f^* \leq \left(1 - \min \left\{ \frac{1}{2}, \frac{2\mu(s^*)^2}{m^2 C_L} \right\}\right)^k (f(\{0, \mathbf{0}\}) - f^*),$$

where  $m$  is the number of non-zeros in  $\{\sigma_i^*\}$ .

Our proof is essentially in the same spirit as that of [16, Theorem 2.8], see also [17, Theorem 2]. It is a pleasant surprise that the latter proof extends without much difficulty to the regularized problem considered here.

*Proof:* In the proof we will use  $f(X_k)$  to denote  $L(X_k) + \lambda \sum_i \sigma_i^{(k)}$  where  $X_k := \sum_{i=1}^k \sigma_i^{(k)} A_i^{(k)}$ .

<sup>6</sup>After completion of the first draft, we became aware of the recent paper [15], which proposed an algorithm similar as our totally corrective version in (7) for the regularized problem, but the rate proven there,  $O(\frac{1}{\epsilon^2})$ , is worse than the one presented in our Theorem 1.

Let us record the optimality condition in (7):  $\forall \tau \in \mathbb{R}_+^k$ , the following holds

$$\sum_{i=1}^k (\langle A_i^{(k)}, \nabla L(X_k) \rangle + \lambda)(\tau_i - \sigma_i^{(k)}) \geq 0, \quad (24)$$

where  $\sigma_i^{(k)}$  denotes the optimal solution in (7).

Take  $0 \leq \eta \leq 1$  whose value will be optimized later. Let  $s_k := \sum_{i=1}^k \sigma_i^{(k)}$ . From Assumption 1 we have

$$\begin{aligned} f((1-\eta)X_k + \eta s^* H_{k+1}) &= L((1-\eta)X_k + \eta s^* H_{k+1}) + (1-\eta)\lambda s_k + \eta\lambda s^* \\ &\leq f(X_k) + \eta \langle s^* H_{k+1} - X_k, \nabla L(X_k) \rangle + \frac{C_L}{2}\eta^2 + \eta\lambda(s^* - s_k). \end{aligned} \quad (25)$$

We need to define two index sets  $I$  and  $J$ , where  $I$  contains the indexes of the elements in  $\{A_i^*\}$  but not in  $\{A_i^{(k)}\}$  while  $J$  contains the indexes of the elements in both  $\{A_i^*\}$  and  $\{A_i^{(k)}\}$ . Note that we can assume that  $I$  is nonempty since otherwise the current totally corrective step will find an optimal solution.

Define  $r = \sum_{i \in I} \sigma_i^*$ , and by the definition of  $H_{k+1}$ ,

$$\begin{aligned} r \langle s^* H_{k+1}, \nabla L(X_k) \rangle &\leq \sum_{i \in I} s^* \sigma_i^* \langle A_i, \nabla L(X_k) \rangle \\ &= \sum_{i \in I} (s^* \sigma_i^* - (s^* - r) \sigma_i^{(k)}) \langle A_i, \nabla L(X_k) \rangle \\ &\leq \sum_{i \in J} (s^* \sigma_i^* - (s^* - r) \sigma_i^{(k)}) \langle A_i, \nabla L(X_k) \rangle + \lambda(s^* - r)(s^* - s_k) \\ &= s^* (\langle X^* - X_k, \nabla L(X_k) \rangle + \lambda(s^* - s_k)) - \lambda r(s^* - s_k) + r \langle X_k, \nabla L(X_k) \rangle \\ &\leq s^* (f^* - f(X_k) - \frac{\mu}{2} \|\sigma^* - \sigma^{(k)}\|_1^2) - \lambda r(s^* - s_k) + r \langle X_k, \nabla L(X_k) \rangle, \end{aligned} \quad (26)$$

where the last inequality follows from the strong convexity assumption, and the second inequality follows from the optimality of  $\sigma^{(k)}$ . Indeed, if  $J - I = \emptyset$ , then  $s^* = r$ , hence we in fact have an equality. Assume otherwise, then the inequality follows from the optimality condition (24).

Now apply (26) to (25), we get

$$\begin{aligned} f((1-\eta)X_k + \eta s^* H_{k+1}) &\leq f(X_k) + \eta \frac{r \langle s^* H_{k+1}, \nabla L(X_k) \rangle - r \langle X_k, \nabla L(X_k) \rangle}{r} + \frac{C_L}{2}\eta^2 + \eta\lambda(s^* - s_k) \\ &\leq f(X_k) - \eta \frac{s^* (f(X_k) - f^* + \frac{\mu}{2} \|\sigma^* - \sigma^{(k)}\|_1^2)}{r} + \frac{C_L}{2}\eta^2. \end{aligned}$$

Apparently  $f(X_{k+1}) \leq \min_{\eta \in [0,1]} f((1-\eta)X_k + \eta s^* H_{k+1})$ , hence

$$f(X_{k+1}) - f^* \leq f(X_k) - f^* - \eta \frac{s^* (f(X_k) - f^* + \frac{\mu}{2} \|\sigma^* - \sigma^{(k)}\|_1^2)}{r} + \frac{C_L}{2}\eta^2.$$

Minimizing  $\eta$  on the right-hand side yields

$$f(X_{k+1}) - f^* \leq f(X_k) - f^* - \min \left\{ \frac{s^* \delta}{2r}, \frac{\delta^2 (s^*)^2}{2r^2 C_L} \right\},$$

where  $\delta := f(X_k) - f^* + \frac{\mu}{2} \|\sigma^* - \sigma^{(k)}\|_1^2 \geq 0$ . It is easy to see that

$$\frac{s^* \delta}{2r} \geq \frac{1}{2} (f(X_k) - f^*).$$

On the other hand,

$$\begin{aligned} \frac{\delta^2(s^*)^2}{2r^2C_L} &\geq \frac{2\mu(f(X_k) - f^*)(s^*)^2 \|\sigma^* - \sigma^{(k)}\|_1^2}{r^2C_L} \geq \frac{2\mu(f(X_k) - f^*)(s^*)^2 \sum_{i \in I} (\sigma_i^*)^2}{C_L (\sum_{i \in I} \sigma_i^*)^2} \\ &\geq \frac{2\mu(f(X_k) - f^*)(s^*)^2}{C_L |I|^2} \geq \frac{2\mu(f(X_k) - f^*)(s^*)^2}{C_L m^2} = \frac{2\mu(s^*)^2}{C_L m^2} (f(X_k) - f^*), \end{aligned} \quad (27)$$

where recall that  $m$  is the number of nonzeros entries in  $\{\sigma_i^*\}$ .

Combining the above two estimates completes the proof:

$$f(X_{k+1}) - f^* \leq \left(1 - \min \left\{ \frac{1}{2}, \frac{2\mu(s^*)^2}{C_L m^2} \right\}\right) (f(X_k) - f^*).$$

■

## C Proof of Proposition 1 and 2

Recall that  $\mathcal{K}$  is the convex hull of  $\mathcal{A}$ .

**Proposition 1**  $\gamma_{\mathcal{K}}(X) = \min_{U,V:UV=X} \frac{1}{2} \sum_i (\|U_{:i}\|_C^2 + \|V_{i:}\|_R^2) = \min_{U,V:UV=X} \sum_i \|U_{:i}\|_C \|V_{i:}\|_R$ .

*Proof:* This proof is similar in spirit to [36]. For any  $UV = X$ , we can write

$$X = \sum_i \|U_{:i}\|_C \|V_{i:}\|_R \frac{U_{:i}}{\|U_{:i}\|_C} \frac{V_{i:}}{\|V_{i:}\|_R}. \quad (28)$$

So by the definition of gauge function,

$$\gamma_{\mathcal{K}}(X) \leq \sum_i \|U_{:i}\|_C \|V_{i:}\|_R \leq \frac{1}{2} \sum_i (\|U_{:i}\|_C^2 + \|V_{i:}\|_R^2). \quad (29)$$

To attain equality, by the the definition of the gauge  $\gamma_{\mathcal{K}}$ , there exist  $\sigma_i$ ,  $\hat{U}$ , and  $\hat{V}$  which satisfy

$$\|\hat{U}_{:i}\|_C = \|\hat{V}_{i:}\|_R = 1, \quad \sum_i \sigma_i \hat{U}_{:i} \hat{V}_{i:} = X, \quad \gamma_{\mathcal{K}}(X) = \sum_i \sigma_i, \quad \sigma_i \geq 0. \quad (30)$$

Then define  $U_{:i} = \sqrt{\sigma_i} \hat{U}_{:i}$  and  $V_{i:} = \sqrt{\sigma_i} \hat{V}_{i:}$ . It is easy to verify that  $UV = X$  and  $\frac{1}{2}(\|U_{:i}\|_C^2 + \|V_{i:}\|_R^2) = \sum_i \|U_{:i}\|_C \|V_{i:}\|_R = \sum_i \sigma_i = \gamma_{\mathcal{K}}(X)$ . ■

**Proposition 2** For any  $U \in \mathbb{R}^{m \times k}$ ,  $V \in \mathbb{R}^{k \times n}$ , there exist  $\alpha_i \geq 0$ ,  $\|\alpha\|_0 \leq k$  and  $\mathbf{u}_i, \mathbf{v}_i$  such that

$$UV = \sum_i \alpha_i \mathbf{u}_i \mathbf{v}_i', \quad \|\mathbf{u}_i\|_C \leq 1, \quad \|\mathbf{v}_i\|_R \leq 1, \quad \sum_i \alpha_i = \frac{1}{2} \sum_i (\|U_{:i}\|_C^2 + \|V_{i:}\|_R^2).$$

*Proof:* Denote  $a_i = \|U_{:i}\|_C$  and  $b_i = \|V_{i:}\|_R$ . Then

$$UV = \sum_i a_i b_i \frac{U_{:i}}{a_i} \frac{V_{i:}}{b_i} = \sum_i \underbrace{\frac{1}{2}(a_i^2 + b_i^2)}_{:=\alpha_i} \underbrace{\sqrt{\frac{a_i b_i}{\frac{1}{2}(a_i^2 + b_i^2)}} \frac{U_{:i}}{a_i}}_{:=\mathbf{u}_i} \underbrace{\sqrt{\frac{a_i b_i}{\frac{1}{2}(a_i^2 + b_i^2)}} \frac{V_{i:}}{b_i}}_{:=\mathbf{v}_i'}. \quad (31)$$

Clearly  $\|\mathbf{u}_i\|_C \leq 1$ ,  $\|\mathbf{v}_i\|_R \leq 1$ , and  $\sum_i \alpha_i = \frac{1}{2} \sum_i (\|U_{:i}\|_C^2 + \|V_{i:}\|_R^2)$ . ■

## D Proof of the strong duality

The goal of this note is to solve the following problem:

$$(QP) \max_{\mathbf{x}, \mathbf{y}} \|A\mathbf{x} + B\mathbf{y} + \mathbf{c}\|, \text{ s.t. } \|\mathbf{x}\| \leq 1, \|\mathbf{y}\| \leq 1. \quad (32)$$

Here  $\mathbf{c}$  is a non-zero vector, and all the norms are Euclidean. Let  $\mathbf{x} \in \mathbb{R}^m$ ,  $\mathbf{y} \in \mathbb{R}^n$ ,  $\mathbf{c} \in \mathbb{R}^t$ ,  $A \in \mathbb{R}^{t \times m}$  and  $B \in \mathbb{R}^{t \times n}$ .

The problem is not convex in this form, because it is *maximizing* a positive semi-definite quadratic. To find a global solution, we first reformulate it. Define

$$\mathbf{z} = \begin{pmatrix} r \\ \mathbf{x} \\ \mathbf{y} \end{pmatrix}, \quad \mathbf{b} = \begin{pmatrix} A'\mathbf{c} \\ B'\mathbf{c} \end{pmatrix} \quad (33)$$

$$Q = - \begin{pmatrix} A'A & A'B \\ B'A & B'B \end{pmatrix}, \quad M_0 = \begin{pmatrix} 0 & -\mathbf{b}' \\ -\mathbf{b} & Q \end{pmatrix} \quad (34)$$

$$M_1 = \begin{pmatrix} -1 & \mathbf{0}_{1 \times m} & \mathbf{0}_{1 \times n} \\ \mathbf{0}_{m \times 1} & I_{m \times m} & \mathbf{0}_{m \times n} \\ \mathbf{0}_{n \times 1} & \mathbf{0}_{n \times m} & \mathbf{0}_{n \times n} \end{pmatrix} \quad (35)$$

$$M_2 = \begin{pmatrix} -1 & \mathbf{0}_{1 \times m} & \mathbf{0}_{1 \times n} \\ \mathbf{0}_{m \times 1} & \mathbf{0}_{m \times m} & \mathbf{0}_{m \times n} \\ \mathbf{0}_{n \times 1} & \mathbf{0}_{n \times m} & I_{n \times n} \end{pmatrix}. \quad (36)$$

Then the problem  $(QP)$  can be rewritten as

$$(QP) \max_{\mathbf{z}} \mathbf{z}' M_0 \mathbf{z} \quad (37)$$

$$\text{s.t. } \mathbf{z}' M_1 \mathbf{z} \leq 0 \quad (38)$$

$$\mathbf{z}' M_2 \mathbf{z} \leq 0 \quad (39)$$

$$r^2 = 1. \quad (40)$$

Denote the inner product between matrices  $X$  and  $Y$  as  $X \bullet Y := \text{tr } X'Y$ . Then we can further rewrite  $(QP)$  as:

$$(QP) \min_{\mathbf{z}} M_0 \bullet (\mathbf{z}\mathbf{z}') \quad (41)$$

$$\text{s.t. } M_1 \bullet (\mathbf{z}\mathbf{z}') \leq 0 \quad (42)$$

$$M_2 \bullet (\mathbf{z}\mathbf{z}') \leq 0 \quad (43)$$

$$I_{00} \bullet (\mathbf{z}\mathbf{z}') = 1, \quad (44)$$

where  $I_{00} = \begin{pmatrix} 1 & \mathbf{0}_{1 \times (m+n)} \\ \mathbf{0}_{(m+n) \times 1} & \mathbf{0}_{(m+n) \times (m+n)} \end{pmatrix}$ . Then a natural SDP relaxation of  $(QP)$  is

$$(SP) \min_X M_0 \bullet X \quad (45)$$

$$\text{s.t. } M_1 \bullet X \leq 0 \quad (46)$$

$$M_2 \bullet X \leq 0 \quad (47)$$

$$I_{00} \bullet X = 1, \quad (48)$$

$$X \succeq \mathbf{0}. \quad (49)$$

Note  $(SP)$  is a convex problem, but there may be a gap between the optimal values of  $(SP)$  and  $(QP)$  because  $(SP)$  dropped the rank-one constraint on  $X$ . The dual problem of  $(SP)$  is

$$(SD) \max_{y_0, y_1, y_2} y_0 \quad (50)$$

$$\text{s.t. } Z := M_0 - y_0 I_{00} + y_1 M_1 + y_2 M_2 \succeq \mathbf{0} \quad (51)$$

$$y_1 \geq 0, y_2 \geq 0. \quad (52)$$

With slight abuse of notation, we denote as  $QP$ ,  $SP$ , and  $SD$  the optimal objective value of the respective problems. We may also write  $QP(A, B, \mathbf{c})$  to make explicit their dependence on  $(A, B, \mathbf{c})$ .

Clearly  $SP = SD$  since the Slater's condition is always met. However,  $QP \geq SP$  because  $(SP)$  does not necessarily admit a rank-one optimal solution. The key conclusion of this note is to rule out this possibility, and show that

$$QP(A, B, \mathbf{c}) = SP(A, B, \mathbf{c}) \quad \text{for all } A, B, \mathbf{c}, \quad (\text{strong duality}). \quad (53)$$

So there must be a rank-one optimal solution to  $(SP)$ , based on which we can easily recover an optimal  $\mathbf{z}$  for  $(QP)$ .

**Generalization** Note the  $\mathbf{b}$  in (33) is determined by  $A, B$  and  $\mathbf{c}$  and does not have full freedom. In this note we will prove a stronger result by dropping this constraint and consider for general unconstrained  $\mathbf{b}$ . Accordingly, we will show a slightly more general relationship:

$$QP(A, B, \mathbf{b}) = SP(A, B, \mathbf{b}) \quad \text{for all } A, B, \mathbf{b}, \quad (\text{strong duality}). \quad (54)$$

Besides proving (54), two computational issues need to be resolved. First, given the optimal  $\{y_i\}$  for  $(SD)$ , how to recover the optimal  $(\mathbf{x}, \mathbf{y})$  for  $(QP)$ . The details are given in Section D.1.3. Second, how to solve  $(SD)$ . We propose using the cutting plane method. Note there are only three variables in  $(SD)$ , and the only tricky part is the positive semi-definite constraint (51). For low dimensional convex optimization, it is quite easy to approximate this (nontrivial) constraint by cutting planes, which relies on the oracle: given an assignment of  $\{y_i\}$ , find a maximal violator of (51), i.e.  $\arg\min_{\mathbf{u}: \|\mathbf{u}\|=1} \mathbf{u}' Z \mathbf{u} \leq 0$ . The solution is simply the eigenvector corresponding to the least algebraically eigenvalue.

**Notation** The set of all  $n$ -by- $n$  symmetric matrices is denoted as  $\mathcal{S}^{n \times n}$ , and the set of all  $n$ -by- $n$  positive semi-definite matrices is denoted as  $\mathcal{S}_+^{n \times n}$ .  $\det(A)$  is the determinant of a matrix  $A$ . Denote the kernel (null space) of a linear map  $A$  as  $\text{Ker}(A)$ , and the range of  $A$  as  $\text{Im}(A)$  (the span of the column space of  $A$ ).

## D.1 Strong Duality

This section proves the strong duality. Our idea is similar to [37]. We first define a set of Properties (called Property  $\mathcal{I}$ ) over the optimal solutions of  $(SP)$  and  $(SD)$ . Next we show that if Property  $\mathcal{I}$  does not hold, then strong duality is guaranteed. Finally we show that in our case, Property  $\mathcal{I}$  can never be met.

### D.1.1 Property $\mathcal{I}$

Let  $\hat{X}$  and  $(\hat{Z}, \hat{y}_0, \hat{y}_1, \hat{y}_2)$  be a pair of optimal solutions for  $(SP)$  and  $(SD)$ , respectively. The KKT condition states

$$\hat{X} \hat{Z} = \mathbf{0} \quad (55)$$

$$\hat{y}_i M_i \bullet \hat{X} = 0, \quad i \in \{1, 2\}. \quad (56)$$

We define a Property  $\mathcal{I}$  in the same spirit as [37].

**Definition 1** We say the optimal pair  $\hat{X}$  and  $(\hat{Z}, \hat{y}_0, \hat{y}_1, \hat{y}_2)$  has Property  $\mathcal{I}$  if:

1.  $M_1 \bullet \hat{X} = 0$  and  $M_2 \bullet \hat{X} = 0$ .
2.  $\text{rank}(\hat{Z}) = m + n - 1$ .
3.  $\text{rank}(\hat{X}) = 2$ , and P3: there is a rank-one decomposition of  $\hat{X}$ ,  $\hat{X} = \mathbf{x}_1 \mathbf{x}_1' + \mathbf{x}_2 \mathbf{x}_2'$ , such that  $M_1 \bullet \mathbf{x}_i \mathbf{x}_i' = 0$  ( $i = 1, 2$ ), and  $(M_2 \bullet \mathbf{x}_1 \mathbf{x}_1')(M_2 \bullet \mathbf{x}_2 \mathbf{x}_2') < 0$ .

The concept of rank-one decomposition is available in subsection D.2. It is simple to symmetrize the item 3 of Property  $\mathcal{I}$  (i.e. swap the role of  $M_1$  and  $M_2$ ), but this is not needed for our purposes. Our key result is to use the Property  $\mathcal{I}$  to characterize the case of strong duality.

**Theorem 3** If  $(SP)$  and  $(SD)$  have a pair of optimal solution  $\hat{X}$  and  $(\hat{Z}, \hat{y}_0, \hat{y}_1, \hat{y}_2)$  which do *not* satisfy Property  $\mathcal{I}$ , then strong duality holds, i.e.  $SP = QP$  and  $(SP)$  has a rank-one optimal solution.

*Proof:* Assume Property  $\mathcal{I}$  does not hold, and we enumerate four exhaustive (but not mutually exclusive) possibilities.

**Case 1:**  $M_1 \bullet \hat{X} \neq 0$  or  $M_2 \bullet \hat{X} \neq 0$ . Without loss of generality, suppose  $M_2 \bullet \hat{X} \neq 0$ . Then  $\hat{y}_2 = 0$  by KKT condition (56). So when solving (SD), we can equivalently clamp  $y_2$  to 0 and optimize only in  $y_0$  and  $y_1$ . This corresponds to solving (SP) by ignoring the constraint (47). By [38], all extreme points of the new feasible region of (SP) has rank 1, and so (SP) must have an optimal solution with rank 1.

**Case 2:**  $M_1 \bullet \hat{X} = M_2 \bullet \hat{X} = 0$  and  $\text{rank}(\hat{X}) \neq 2$ . Let  $r = \text{rank}(\hat{X})$ . Obviously  $r > 0$  since  $I_{00} \hat{X} = 1$ . If  $r = 1$ , then (SP) already has a rank-one solution and (QP) is solved. So we only need to consider the case  $r \geq 3$ . By Proposition 6 with  $\delta_1 = \delta_2 = 0$ , there is a rank-one decomposition of  $\hat{X}$  satisfying

$$\hat{X} = \mathbf{x}_1 \mathbf{x}_1' + \mathbf{x}_2 \mathbf{x}_2' + \dots + \mathbf{x}_r \mathbf{x}_r' \quad (57)$$

$$M_1 \bullet \mathbf{x}_i \mathbf{x}_i' = 0, \quad \text{for } i = 1, \dots, r \quad (58)$$

$$M_2 \bullet \mathbf{x}_i \mathbf{x}_i' = 0, \quad \text{for } i = 1, \dots, r - 2. \quad (59)$$

By Proposition 3, we have  $Z(\mathbf{x}_1 \mathbf{x}_1') = \mathbf{0}$ . Let  $\mathbf{x}_1 = (t_1, \mathbf{u}_1', \mathbf{v}_1')'$ . Then

$$(58) \Rightarrow -s_1^2 + \|\mathbf{u}_1\|^2 = 0 \quad (60)$$

$$(59) \Rightarrow -s_1^2 + \|\mathbf{v}_1\|^2 = 0. \quad (61)$$

So if  $s_1 = 0$  then  $\mathbf{u}_1 = \mathbf{v}_1 = 0$ , which means  $\mathbf{x}_1 = \mathbf{0}$ . Contradiction. So  $s_1 \neq 0$  and we can easily see that  $\hat{X}_1 := \mathbf{x}_1 \mathbf{x}_1' / s_1^2$  satisfies the KKT conditions (55) and (56), together with  $I_{00} \hat{X}_1 = 1$ . Hence  $\mathbf{x}_1 \mathbf{x}_1' / s_1^2$  is a rank-one optimal solution to (SP) and  $\mathbf{x}_1 / s_1$  is an optimal solution to (QP).

**Case 3:**  $M_1 \bullet \hat{X} = M_2 \bullet \hat{X} = 0$ ,  $\text{rank}(\hat{X}) = 2$ , but P3 does not hold. By Proposition 4, there must be a rank-one decomposition  $\hat{X} = \mathbf{x}_1 \mathbf{x}_1' + \mathbf{x}_2 \mathbf{x}_2'$  such that

$$M_1 \bullet (\mathbf{x}_1 \mathbf{x}_1') = M_1 \bullet (\mathbf{x}_2 \mathbf{x}_2') = 0. \quad (62)$$

So the failure of P3 implies

$$M_2 \bullet \mathbf{x}_1 \mathbf{x}_1' = M_2 \bullet \mathbf{x}_2 \mathbf{x}_2' = 0, \quad (63)$$

because  $M_2 \bullet \mathbf{x}_1 \mathbf{x}_1' + M_2 \bullet \mathbf{x}_2 \mathbf{x}_2' = M_2 \bullet \hat{X} = 0$ . Using exactly the same argument as in Case 2, we conclude that  $s_1$ , the first element of  $\mathbf{x}_1$ , is non-zero, and  $\mathbf{x}_1 \mathbf{x}_1' / s_1^2$  is a rank-one optimal solution to (SP). Obviously,  $\mathbf{x}_2 \mathbf{x}_2' / s_2^2$  is also a rank-one solution to (SP), where  $s_2$  is the first element of  $\mathbf{x}_2$ .

**Case 4:**  $M_1 \bullet \hat{X} = M_2 \bullet \hat{X} = 0$ ,  $\text{rank}(\hat{X}) = 2$ ,  $M_1 \bullet (\mathbf{x}_1 \mathbf{x}_1') = M_1 \bullet (\mathbf{x}_2 \mathbf{x}_2') = 0$ ,  $(M_2 \bullet \mathbf{x}_1 \mathbf{x}_1')(M_2 \bullet \mathbf{x}_2 \mathbf{x}_2') < 0$ , and  $\text{rank}(\hat{Z}) \neq m + n - 1$ . By Sylvester's inequality,

$$\text{rank}(\hat{Z}) + \text{rank}(\hat{X}) - (m + n + 1) \leq \text{rank}(\hat{Z} \hat{X}). \quad (64)$$

Now  $\text{rank}(\hat{X}) = 2$  and  $\hat{Z} \hat{X} = \mathbf{0}$ , so  $\text{rank}(\hat{Z}) \leq m + n - 1$ . Therefore in this particular case  $\text{rank}(\hat{Z}) \leq m + n - 2$ . So by 0.4.5(d) of [39],

$$\text{rank}(\hat{X} + \hat{Z}) \leq \text{rank}(\hat{X}) + \text{rank}(\hat{Z}) \quad (65)$$

$$\leq 2 + (m + n - 2) = m + n. \quad (66)$$

Thus there must be a  $\mathbf{y} \neq \mathbf{0}$  such that  $(\hat{X} + \hat{Z})\mathbf{y} = \mathbf{0}$ , and

$$\mathbf{y}' \hat{X} \mathbf{y} + \mathbf{y}' \hat{Z} \mathbf{y} = \mathbf{y}' (\hat{X} + \hat{Z}) \mathbf{y} = 0. \quad (67)$$

Since both  $\hat{X}$  and  $\hat{Z}$  are positive semi-definite, we conclude that  $\mathbf{y} \in \text{Ker}(\hat{X}) \cap \text{Ker}(\hat{Z})$ . Now define

$$X := \hat{X} + \mathbf{y} \mathbf{y}' = \mathbf{x}_1 \mathbf{x}_1' + \mathbf{x}_2 \mathbf{x}_2' + \mathbf{y} \mathbf{y}'. \quad (68)$$

Obviously  $\text{rank}(X) = 3$  and  $\hat{Z} X = \mathbf{0}$ . Since

$$M_1 \bullet (\mathbf{x}_1 \mathbf{x}_1') = M_1 \bullet (\mathbf{x}_2 \mathbf{x}_2') = 0 \quad (69)$$

$$(M_2 \bullet \mathbf{x}_1 \mathbf{x}_1')(M_2 \bullet \mathbf{x}_2 \mathbf{x}_2') < 0, \quad (70)$$

so by Proposition 5 with  $\delta_1 = \delta_2 = 0$ , there must be an  $\mathbf{x}$  such that  $X$  is rank-one decomposable at  $\mathbf{x}$  and

$$M_1 \bullet \mathbf{x}\mathbf{x}' = 0, \quad M_2 \bullet \mathbf{x}\mathbf{x}' = 0. \quad (71)$$

Since  $\hat{Z}X = \mathbf{0}$ , Proposition 3 implies  $\hat{Z}\mathbf{x} = \mathbf{0}$  and so  $\hat{Z} \bullet \mathbf{x}\mathbf{x}' = 0$ . Based on the satisfaction of the KKT conditions (55) and (56), we conclude that  $\mathbf{x}\mathbf{x}'/s^2$  is a rank-one optimal solution to  $(SP)$ , where  $s$  is the first element of  $\mathbf{x}$ .  $s$  must be non-zero because of (71) and the same argument as in Case 2. ■

### D.1.2 Strong Duality

Let us denote  $(A, B, \mathbf{b})$  collectively as  $\Gamma := (A, B, \mathbf{b})$ , and define a “Frobenius” norm on  $\Gamma$  as  $\|\Gamma\|^2 := \|A\|_F^2 + \|B\|_F^2 + \|\mathbf{b}\|^2$ . Ideally we wish to show that for any  $\Gamma$ , the Property  $\mathcal{I}$  does not hold for some solutions to  $(SP)$  and  $(SD)$ , hence strong duality holds (Theorem 3). However, this is hard. So we resort to the argument of  $\epsilon$ -perturbation.

Before proceeding, we first make a very simple rewriting of  $(QP)$ . Let  $p = \max\{t, m, n\}$ . By padding zeros if necessary, we can expand  $A$  and  $B$  into  $p$ -by- $p$  dimensional matrices, and  $\mathbf{c}$  into an  $p$  dimensional vector. Let  $\mathbf{x}$  and  $\mathbf{y}$  be  $p$  dimensional too. Obviously, the optimal values of  $(QP)$  and  $(SP)$  in this new problem are the same as those in the original problem, respectively. Therefore, henceforth we will only consider square matrices  $A$  and  $B$ . For notational convenience, we just call all  $t$ ,  $m$ , and  $n$  as  $n$ .

Of key importance is the Danskin’s theorem.

**Lemma 1 (Danskin)** *Suppose  $f : Z \times \Omega \rightarrow \mathbb{R}$  is a continuous function, where  $Z \subseteq \mathbb{R}^n$  is a compact set and  $\Omega \subseteq \mathbb{R}^m$  is an open set. For any  $\mathbf{z}$ ,  $\nabla_\omega f(\mathbf{z}, \omega)$  exists and is continuous. Then the marginal function*

$$\phi(\omega) := \max_{\mathbf{z} \in Z} f(\mathbf{z}, \omega) \quad (72)$$

*is continuous.*

Note that Danskin’s theorem does not require convexity. Let the  $\mathbf{z}$  in Lemma 1 correspond to  $(\mathbf{x}', \mathbf{y}')'$  in  $(QP)$ ,  $\omega$  to  $\Gamma$ ,  $Z$  to  $\{\mathbf{x} : \|\mathbf{x}\| \leq 1\} \times \{\mathbf{y} : \|\mathbf{y}\| \leq 1\}$ , and  $\Omega$  to the whole Euclidean space. Then Lemma 1 implies that  $QP(\Gamma)$  is continuous in  $\Gamma$ . Similarly,  $SP(\Gamma)$  is continuous.

The continuity at  $\Gamma$  means that for any  $\epsilon > 0$ , there exists  $\delta > 0$ , such that for all  $\hat{\Gamma}$  in the  $\delta$  neighborhood of  $\Gamma$ :

$$\mathcal{B}_\delta(\Gamma) := \left\{ \hat{\Gamma} : \|\hat{\Gamma} - \Gamma\| < \delta \right\}, \quad (73)$$

we have

$$\left| QP(\hat{\Gamma}) - QP(\Gamma) \right| < \epsilon, \quad (74)$$

$$\left| SP(\hat{\Gamma}) - SP(\Gamma) \right| < \epsilon. \quad (75)$$

Our key result will be the following theorem.

**Theorem 4** *For any  $\Gamma$  and  $\delta > 0$ , there exists  $\Gamma_\delta \in \mathcal{B}_\delta(\Gamma)$  such that strong duality holds at  $\Gamma_\delta$ :*

$$QP(\Gamma_\delta) = SP(\Gamma_\delta). \quad (76)$$

Using Theorem 4, we can easily prove strong duality.

**Corollary 1**  $QP(\Gamma) = SP(\Gamma)$  for all  $\Gamma$ .

*Proof:* It suffices to show that for any  $\epsilon > 0$ ,

$$|QP(\Gamma) - SP(\Gamma)| < 2\epsilon. \quad (77)$$



By continuity of  $QP$  and  $SP$ , there exists a  $\delta > 0$ , such that (74) and (75) hold for all  $\hat{\Gamma} \in \mathcal{B}_\delta(\Gamma)$ . By Theorem 4, there exists  $\Gamma_\delta \in \mathcal{B}_\delta(\Gamma)$  such that (76) holds. Combining it with (74) and (75) (with  $\hat{\Gamma} = \Gamma_\delta$ ), we obtain (77).  $\blacksquare$

Finally we prove Theorem 4.

*Proof:* Clearly  $\mathcal{B}_{\delta/2}(A, B, \mathbf{b})$  contains invertible matrices for any  $A, B$ , and  $\delta > 0$ . Arbitrarily pick two such matrices and call them  $A_\delta$  and  $B_\delta$ . By Theorem 3, to establish (76) it suffices to show that the corresponding  $(SP)$  and  $(SD)$  problems at  $(A_\delta, B_\delta)$  have a pair of optimal solutions  $\hat{X}$  and  $(\hat{Z}, \hat{y}_0, \hat{y}_1, \hat{y}_2)$  which do not satisfy Property  $\mathcal{I}$ . We will focus on the second condition:  $\text{rank}(\hat{Z}) = 2n - 1$ .

If  $\text{rank}(\hat{Z}) \neq 2n - 1$ , then by Theorem 3 strong duality holds at  $\Gamma_\delta := (A_\delta, B_\delta, \mathbf{b})$ . Otherwise suppose  $\text{rank}(\hat{Z}) = 2n - 1$ . Noting (51), we have

$$\hat{Z} = M_0 - \hat{y}_0 I_{00} + \hat{y}_1 M_1 + \hat{y}_2 M_2 = \begin{pmatrix} -\hat{y}_0 - \hat{y}_1 - \hat{y}_2 & -\mathbf{b}' \\ -\mathbf{b} & R \end{pmatrix}, \quad (78)$$

$$\text{where } R = \begin{pmatrix} \hat{y}_1 I - A'_\delta A_\delta & -A'_\delta B_\delta \\ -B'_\delta A_\delta & \hat{y}_2 I - B'_\delta B_\delta \end{pmatrix}. \quad (79)$$

Note that for any given  $y_1$  and  $y_2$ ,  $(SD)$  maximizes  $y_0$  subject to  $\hat{Z} \succeq \mathbf{0}$ . By Proposition 7, we know that

$$2n - 1 = \text{rank}(\hat{Z}) = \text{rank}(R). \quad (80)$$

Denote  $P = \hat{y}_1 I - A'_\delta A_\delta$  and  $Q = \hat{y}_2 I - B'_\delta B_\delta$ . Then by Proposition 8, we have  $\text{rank}(P) + \text{rank}(Q) = 2n - 1$  or  $2n$ . Now we discuss three cases.

**Case 1:**  $\text{rank}(P) = n$  and  $\text{rank}(Q) = n - 1$ . By Schur complement, we have  $Q \succeq B'_\delta A_\delta P^{-1} A'_\delta B_\delta$ . So by Exercise 4.3.14 of [39],

$$\lambda_{\min}(Q) \geq \lambda_{\min}(B'_\delta A_\delta P^{-1} A'_\delta B_\delta), \quad (81)$$

where  $\lambda_{\min}$  stands for the smallest eigenvalue. Since  $A_\delta$  and  $B_\delta$  are both invertible,  $B'_\delta A_\delta P^{-1} A'_\delta B_\delta$  must be positive definite and its smallest eigenvalue is strictly positive. But  $\text{rank}(Q) = n - 1$ , meaning the minimum eigenvalue of  $Q$  is 0. So contraction with (81).

**Case 2:**  $\text{rank}(P) = n - 1$  and  $\text{rank}(Q) = n$ . Same argument as for Case 1.

**Case 3:**  $\text{rank}(P) = \text{rank}(Q) = n$ . Since  $\text{rank}(R) = 2n - 1$ ,  $R$  must have an eigen-vector  $\mathbf{u}_0$  whose corresponding eigen-value is 0. In fact  $\mathbf{u}_0$  is unique up to negation. By Proposition 7,  $\mathbf{b} \in \text{Im}(R)$ , so  $\mathbf{b}'\mathbf{u}_0 = 0$ . Now perturb the  $\mathbf{b}$  in  $Z$  in the direction of  $\mathbf{u}_0$ :

$$\hat{Z}(t) = \begin{pmatrix} -\hat{y}_0(t) - \hat{y}_1(t) - \hat{y}_2(t) & -\mathbf{b}' - t\mathbf{u}_0' \\ -\mathbf{b} - t\mathbf{u}_0 & R(t) \end{pmatrix}, \quad t \in \mathbb{R}, \quad (82)$$

where  $\hat{y}_i(t)$  are the optimal solutions for  $SD(A_\delta, B_\delta, \mathbf{b} + t\mathbf{u}_0)$  and  $R(t)$  uses  $\hat{y}_i(t)$ . Denote  $P(t) = \hat{y}_1(t)I - A'_\delta A_\delta$  and  $Q(t) = \hat{y}_2(t)I - B'_\delta B_\delta$ . If there exists  $t \in (-\delta/2, \delta/2)$  such that  $\text{rank}(\hat{Z}(t)) \neq 2n - 1$ , then  $(A_\delta, B_\delta, \mathbf{b} + t\mathbf{u}_0)$  is the  $\Gamma_\delta$  in Theorem 4. Otherwise,  $\text{rank}(\hat{Z}(t)) = 2n - 1$  for all  $|t| < \delta/2$  and by the same argument as in Case 1 and 2, we conclude that  $\text{rank}(P(t)) = \text{rank}(Q(t)) = n$ ,  $\forall t$ . Since  $\text{rank}(R(t)) = \text{rank}(\hat{Z}(t)) = 2n - 1$ ,  $R(t)$  must have an eigen-vector  $\mathbf{u}(t)$  whose corresponding eigen-value is 0. Clearly  $\mathbf{u}(t)$  is unique up to the sign, and we can set  $\mathbf{u}(0) = \mathbf{u}_0$ . By Proposition 7,  $\mathbf{b} + t\mathbf{u}_0$  must be in the range of  $R(t)$ . If we can show that  $\mathbf{u}(t) = (1 + ct)\mathbf{u}_0 + \mathbf{o}(t)$  where  $\lim_{t \rightarrow 0} \mathbf{o}(t)/t = \mathbf{0}$  and  $c \in \mathbb{R}$  is independent of  $t$ , then

$$0 = (\mathbf{b} + t\mathbf{u}_0)'\mathbf{u}(t) = (\mathbf{b} + t\mathbf{u}_0)'((1 + ct)\mathbf{u}_0 + \mathbf{o}(t)) = t + ct^2 + \mathbf{b}'\mathbf{o}(t) + t\mathbf{u}_0'\mathbf{o}(t). \quad (83)$$

Dividing both sides by  $t$  and driving  $t$  to 0, we get  $0 = 1 + 0 + 0 + 0$ . Contradiction.

To show  $\mathbf{u}(t) = (1 + ct)\mathbf{u}_0 + \mathbf{o}(t)$ , we need to analyze the gradient of  $\mathbf{u}(t)$  at  $t = 0$ . First we show  $\hat{y}_i(t)$  is differentiable in  $t$  at  $t = 0$  for  $i = 1, 2$ . Since  $\text{rank}(P(t)) = \text{rank}(Q(t)) = n$  and

$\text{rank}(R(t)) = 2n - 1$ , we have  $0 = \det(R(t)) = \det(P(t)) \cdot \det(Q(t) - B'_\delta A_\delta P(t)^{-1} A'_\delta B_\delta)$ . In conjunction with Schur complement, we get

$$\hat{y}_2(t) = \lambda_{\max} (B'_\delta B_\delta + B'_\delta A_\delta (\hat{y}_1(t)I - A'_\delta A_\delta)^{-1} A'_\delta B_\delta), \quad (84)$$

$$\hat{y}_1(t) = \lambda_{\max} (A'_\delta A_\delta + A'_\delta B_\delta (\hat{y}_2(t)I - B'_\delta B_\delta)^{-1} B'_\delta A_\delta). \quad (85)$$

So a larger  $\hat{y}_1(t)$  implies a smaller  $\hat{y}_2(t)$  and a smaller  $\hat{y}_1(t)$  implies a larger  $\hat{y}_2(t)$ . By Proposition 7,

$$(\hat{y}_1(t), \hat{y}_2(t)) = \underset{y_1, y_2}{\operatorname{argmin}} y_1 + y_2 + (\mathbf{b} + t\mathbf{u}_0)' \begin{pmatrix} y_1 I - A'_\delta A_\delta & -A'_\delta B_\delta \\ -B'_\delta A_\delta & y_2 I - B'_\delta B_\delta \end{pmatrix}^\dagger (\mathbf{b} + t\mathbf{u}_0). \quad (86)$$

In general, pseudo-inverse is not even continuous. However, since we know that  $\text{rank}(R(t)) = 2n - 1$  (constant rank), so the pseudo-inverse is differentiable in  $R(t)$  [40]. So  $\hat{y}_1(t)$  and  $\hat{y}_2(t)$  are differentiable in  $t$  at  $t = 0$ .

By Theorem 1 of [41], we know there exists a choice of the sign for  $\mathbf{u}(t)$  which satisfies

$$\left. \frac{\partial \mathbf{u}(t)}{\partial t} \right|_{t=0} = \mathbf{u}_0 \sum_{ij} A_{ij} \left. \frac{\partial R_{ij}(t)}{\partial t} \right|_{t=0}, \quad \text{where } A = -R(0)^\dagger \quad (87)$$

$$= \mathbf{u}_0 \left( \hat{y}'_1(0) \sum_{i=1}^n A_{ii} + \hat{y}'_2(0) \sum_{i=n+1}^{2n} A_{ii} \right). \quad (88)$$

Setting  $c := \hat{y}'_1(0) \sum_{i=1}^n A_{ii} + \hat{y}'_2(0) \sum_{i=n+1}^{2n} A_{ii}$  yields  $\mathbf{u}(t) = (1 + ct)\mathbf{u}_0 + \mathbf{o}(t)$ . ■

### D.1.3 Recovering the optimal solution

With the guarantee of strong duality, an algorithm is needed to recover a rank-one optimal solution to  $(SP)$  when given an optimal dual solution  $\hat{Z}$  to  $(SD)$ . By the KKT condition, all we need is two vectors  $\mathbf{x}$  and  $\mathbf{y}$  satisfying:

$$\mathbf{z}' \hat{Z} \mathbf{z} = 0, \quad \|\mathbf{x}\| \leq 1, \quad \|\mathbf{y}\| \leq 1, \quad (89)$$

where  $\mathbf{z} = (1, \mathbf{x}', \mathbf{y})'$ . Note this is a necessary and sufficient condition for optimal  $\mathbf{x}$  and  $\mathbf{y}$ . Since  $\hat{Z}$  is positive semi-definite,  $\mathbf{z}$  must be in the null space of  $\hat{Z}$ . Suppose  $\text{Ker}(\hat{Z})$  is spanned by  $(\mathbf{g}_1, \dots, \mathbf{g}_k)$ . Let

$$G = (\mathbf{g}_1, \dots, \mathbf{g}_k) = \begin{pmatrix} G_0 \\ G_X \\ G_Y \end{pmatrix}. \quad (90)$$

Then it suffices to find  $\alpha \in \mathbb{R}^k$  such that  $|G_0 \alpha| = 1$ ,  $\|G_X \alpha\| = 1$ , and  $\|G_Y \alpha\| = 1$ . To this end, we only need to find  $\alpha$  satisfying

$$\alpha' (G'_X G_X - G'_0 G_0) \alpha = 0 \quad (91)$$

$$\alpha' (G'_Y G_Y - G'_0 G_0) \alpha = 0 \quad (92)$$

$$G_0 \alpha \neq 0, \quad (93)$$

and then scale it properly. In the sequel, we will first find  $\alpha$  which satisfies the first two conditions and then show how to satisfy the last one. Denote  $\tilde{S} = G'_X G_X - G'_0 G_0$  and  $\tilde{T} = G'_Y G_Y - G'_0 G_0$ . Let their algebraically smallest eigenvalues be  $s_X$  and  $s_Y$ , and define  $s = 1 - \min(s_X, s_Y)$ . Then  $S := \tilde{S} + sI$  and  $T := \tilde{T} + sI$  must be positive definite, and  $\alpha$  only needs to satisfy

$$\alpha' S \alpha = s \alpha' \alpha \quad (94)$$

$$\alpha' T \alpha = s \alpha' \alpha \quad (95)$$

$$G_0 \alpha \neq 0. \quad (96)$$

Denote  $\hat{\alpha} = \alpha / \|\alpha\|$ , then it is equivalent to

$$\hat{\alpha}' S \hat{\alpha} = s \quad (97)$$

$$\hat{\alpha}' T \hat{\alpha} = s \quad (98)$$

$$G_0 \hat{\alpha} \neq 0. \quad (99)$$

Because both  $S$  and  $T$  are positive semidefinite, by [39, Corollary 4.6.12] there exists a nonsingular matrix  $R$  such that  $RSR' = I$  and  $RTR'$  is real diagonal. In fact this  $R$  can be constructed analytically. Let  $S$  have eigen-decomposition  $S = UDU'$  where  $D$  is diagonal. Denote  $H = U\sqrt{D}U'$  and let  $HTH$  have eigen-decomposition  $HTH = V\Lambda V'$ . Then  $R$  can be simply chose as  $R = V'H^{-1} = VUD^{-1/2}U'$ . Let  $RTR'$  be  $\text{diag}\{\sigma_i\}$ . Denote  $\beta = R\hat{\alpha}$ , then  $\beta$  only needs to satisfy

$$\beta' \beta = s \quad (100)$$

$$\beta' \Sigma \beta = s \quad (101)$$

$$G_0 R^{-1} \beta \neq 0. \quad (102)$$

It is easy to find a  $\beta$  which satisfies the first two constraints, because it is guaranteed that there exists a  $\beta$  which satisfies all the three conditions. Once we get such a  $\beta$ , suppose  $G_0 R^{-1} \beta = 0$ . Then we can flip the sign of one of its nonzero components. If its product with  $G_0 R^{-1}$  is still 0, then it means the corresponding entry in  $G_0 R^{-1}$  is 0. But  $G_0 R^{-1}$  cannot be straight 0 because that would imply  $G_0$  is a zero vector which violates the assumption that  $G$  is the basis of  $\text{Ker}(\hat{Z})$ . Therefore we can always find a  $\beta$  which satisfies (100) to (102).

## D.2 Preliminaries in Matrix Analysis

### D.2.1 Matrix Rank-one decomposition

Let  $X$  be a  $n$ -by- $n$  positive semi-definite matrix with  $\text{rank}(X) = r$ . Then a set of  $r$  vectors  $\{\mathbf{x}_1, \dots, \mathbf{x}_r\}$  in  $\mathbb{R}^n$  is called a rank-one decomposition of  $X$  if  $X = \sum_{i=1}^r \mathbf{x}_i \mathbf{x}_i'$ .

It is noteworthy that the  $\mathbf{x}_i$ 's are not necessarily orthogonal to each other ( $\mathbf{x}_i' \mathbf{x}_j = 0$  for  $i \neq j$ ), but they must be linearly independent. This leads to the following useful result.

**Proposition 3** Suppose  $ZX = \mathbf{0}$  and  $\{\mathbf{x}_1, \dots, \mathbf{x}_r\}$  is a rank-one decomposition of  $X$ . Then  $Z\mathbf{x}_i = \mathbf{0}, \forall i$ .

*Proof:* Denote  $\mathbf{y}_i := Z\mathbf{x}_i$ . Suppose otherwise  $\mathbf{y}_1 \neq \mathbf{0}$ . Since  $ZX = \mathbf{0}$ , we have

$$\mathbf{0} = X' Z' \mathbf{y}_1 = \sum_{i=1}^r \mathbf{x}_i \mathbf{x}_i' Z' \mathbf{y}_1 = \sum_{i=1}^r (\mathbf{y}_i' \mathbf{y}_1) \mathbf{x}_i. \quad (103)$$

Since  $\mathbf{y}_1 \neq \mathbf{0}$ , this violates the linear independence of  $\mathbf{x}_1, \dots, \mathbf{x}_r$ . ■

$X$  is called rank-one decomposable at a vector  $\mathbf{x}_1$  if there exist other  $r - 1$  vectors  $\mathbf{x}_2, \dots, \mathbf{x}_r$  such that  $X = \sum_{i=1}^r \mathbf{x}_i \mathbf{x}_i'$ .

The following three theorems play an important role in our proof.

**Proposition 4 (Corollary 4 of [42])** Suppose  $X \in \mathcal{S}_+^{n \times n}$  with  $\text{rank}(X) = r$ .  $Z \in \mathcal{S}^{n \times n}$  and  $Z \bullet X \geq 0$ . Then there must be a rank-one decomposition of  $X = \mathbf{x}_1 \mathbf{x}_1' + \dots + \mathbf{x}_r \mathbf{x}_r'$  such that  $Z \bullet (\mathbf{x}_i \mathbf{x}_i') = Z \bullet X / r$  for all  $i = 1, \dots, r$ .

**Proposition 5 (Lemma 3.3 of [37])** Suppose  $X \in \mathcal{S}_+^{n \times n}$  with  $\text{rank } r \geq 3$ .  $A_1, A_2 \in \mathcal{S}^{n \times n}$ . Let  $\{\mathbf{x}_1, \dots, \mathbf{x}_r\}$  be a rank-one decomposition of  $X$ . If

$$A_1 \bullet \mathbf{x}_1 \mathbf{x}_1' = A_1 \bullet \mathbf{x}_2 \mathbf{x}_2' = \delta_1 \quad (104)$$

$$(A_2 \bullet \mathbf{x}_1 \mathbf{x}_1' - \delta_2)(A_2 \bullet \mathbf{x}_2 \mathbf{x}_2' - \delta_2) < 0, \quad (105)$$

then there is a vector  $\mathbf{y} \in \mathbb{R}^n$  such that  $X$  is rank-one decomposable at  $\mathbf{y}$  and

$$A_1 \bullet \mathbf{y} \mathbf{y}' = \delta_1, \quad A_2 \bullet \mathbf{y} \mathbf{y}' = \delta_2. \quad (106)$$

**Proposition 6 (Theorem 3.4 of [37])** Suppose  $X \in \mathcal{S}_+^{n \times n}$  with rank  $r \geq 3$ .  $A_1, A_2 \in \mathcal{S}^{n \times n}$ . If

$$A_1 \bullet X = \delta_1, \quad A_2 \bullet X = \delta_2, \quad (107)$$

then  $X$  has a rank-one decomposition  $\{\mathbf{x}_1, \dots, \mathbf{x}_r\}$  such that

$$A_1 \bullet \mathbf{x}_i \mathbf{x}_i' = \delta_1/r \quad \text{for } i = 1, \dots, r, \quad (108)$$

$$A_2 \bullet \mathbf{x}_i \mathbf{x}_i' = \delta_2/r \quad \text{for } i = 1, \dots, r-2. \quad (109)$$

## D.2.2 Bounding the rank of block matrices

**Proposition 7** Let  $X \in \mathcal{S}_+^{n \times n}$  and  $\mathbf{b} \in \text{im}(X)$ . Define

$$Y(c) = \begin{pmatrix} c & \mathbf{b}' \\ \mathbf{b} & X \end{pmatrix}, \quad c \in \mathbb{R}. \quad (110)$$

Suppose  $Y(c) \succeq \mathbf{0}$  and  $\text{rank}(X) = r$ . Then

$$\text{rank}(Y(c)) \in \{r, r+1\}. \quad (111)$$

Furthermore, if  $c^*$  is the minimum value such that  $Y(c) \succeq \mathbf{0}$ :

$$c^* = \underset{c: Y(c) \succeq \mathbf{0}}{\text{arginf}} \, c, \quad (112)$$

then we have  $\text{rank}(Y(c^*)) = r$ .

Finally, if  $\mathbf{b} \notin \text{im}(X)$ , then  $Y(c) \succeq \mathbf{0}$  cannot hold for any  $c \in \mathbb{R}$ .

*Proof:* Since adding rows and columns to a matrix will not decrease its rank, so obviously  $\text{rank}(Y(c)) \geq \text{rank}(X) = r$ . To show  $\text{rank}(Y(c)) \leq r+1$ , let the eigenvalues of  $X$  and  $Y(c)$  be  $\lambda_1, \dots, \lambda_n$  and  $\hat{\lambda}_1, \dots, \hat{\lambda}_{n+1}$ , both in increasing order. Then by Theorem 4.3.8 of [39], we have

$$\hat{\lambda}_1 \leq \lambda_1 \leq \hat{\lambda}_2 \leq \lambda_2 \leq \dots \leq \hat{\lambda}_n \leq \lambda_n \leq \hat{\lambda}_{n+1}. \quad (113)$$

Since  $\text{rank}(X) = r$  and  $X \in \mathcal{S}_+^{n \times n}$ , so  $\lambda_1 = \dots = \lambda_{n-r} = 0$ . As  $Y(c) \succeq \mathbf{0}$ , we have

$$0 \leq \hat{\lambda}_1 \leq \dots \leq \hat{\lambda}_{n-r} \leq 0. \quad (114)$$

Therefore  $\text{rank}(Y(c)) \leq (n+1) - (n-r) = r+1$ .

As for the second part, we can actually compute  $c^*$  explicitly.  $Y(c) \succeq \mathbf{0}$  if and only if  $(\alpha, \mathbf{u}')Y(c)(\alpha, \mathbf{u}')' \geq 0$  for all  $\alpha \in \mathbb{R}$  and  $\mathbf{u} \in \mathbb{R}^n$ , i.e.

$$c\alpha^2 + 2\alpha\mathbf{b}'\mathbf{u} + \mathbf{u}'X\mathbf{u} \geq 0, \quad \forall \alpha \in \mathbb{R}, \mathbf{u} \in \mathbb{R}^n. \quad (115)$$

If  $\alpha = 0$ , this must hold true since  $X \succeq \mathbf{0}$ . Otherwise,

$$c^* = \max_{\alpha \neq 0, \mathbf{u}} \frac{-\mathbf{u}'X\mathbf{u} - 2\alpha\mathbf{b}'\mathbf{u}}{\alpha^2} \quad (116)$$

$$= \max_{\mathbf{z}} -\mathbf{z}'X\mathbf{z} - 2\mathbf{b}'\mathbf{z} \quad (117)$$

$$= \begin{cases} \mathbf{b}'X^\dagger\mathbf{b} & \text{if } \mathbf{b} \in \text{im}(X) \\ \infty & \text{if } \mathbf{b} \notin \text{im}(X) \end{cases}, \quad (118)$$

where  $X^\dagger$  is the pseudo-inverse of  $X$ . To prove  $\text{rank}(Y(c^*)) = r$ , it suffices to show that  $\text{Ker}(Y(c^*)) = n-r+1$ . Towards this end first note

$$Y(c^*) \begin{pmatrix} -1 \\ X^\dagger\mathbf{b} \end{pmatrix} = \begin{pmatrix} \mathbf{b}'X^\dagger\mathbf{b} & \mathbf{b}' \\ \mathbf{b} & X \end{pmatrix} \begin{pmatrix} -1 \\ X^\dagger\mathbf{b} \end{pmatrix} \quad (119)$$

$$= \begin{pmatrix} 0 \\ -\mathbf{b} + XX^\dagger\mathbf{b} \end{pmatrix} = \mathbf{0}. \quad (120)$$

where the last step also used  $\mathbf{b} \in \text{im}(X)$ . Hence  $\begin{pmatrix} -1 \\ X^\dagger\mathbf{b} \end{pmatrix} \in \text{Ker}(Y(c^*))$ .

Furthermore,  $\text{rank}(X) = r$  implies there are  $n - r$  linearly independent vectors  $\mathbf{u}_1, \dots, \mathbf{u}_{n-r} \in \text{Ker}(X)$ . As  $\mathbf{b} \in \text{im}(X)$ , so  $\mathbf{b}'\mathbf{u}_i = 0$  for all  $i$ . Therefore

$$Y(c^*) \begin{pmatrix} 0 \\ \mathbf{u}_i \end{pmatrix} = \begin{pmatrix} c^* & \mathbf{b}' \\ \mathbf{b} & X \end{pmatrix} \begin{pmatrix} 0 \\ \mathbf{u}_i \end{pmatrix} = \begin{pmatrix} \mathbf{b}'\mathbf{u}_i \\ X\mathbf{u}_i \end{pmatrix} = \mathbf{0}. \quad (121)$$

Clearly  $\begin{pmatrix} -1 \\ X^\dagger \mathbf{b} \end{pmatrix}, \begin{pmatrix} 0 \\ \mathbf{u}_1 \end{pmatrix}, \dots, \begin{pmatrix} 0 \\ \mathbf{u}_{n-r} \end{pmatrix}$  are linearly independent, so  $\text{Ker}(Y(c^*)) \geq n-r+1$ , i.e.  $\text{rank}(Y(c^*)) \leq r$ .

Finally, it is obvious from (118) that no  $c \in \mathbb{R}$  makes  $Y(c) \succeq \mathbf{0}$  if  $\mathbf{b} \notin \text{im}(X)$ . ■

**Proposition 8** *Let  $P, Q, R$  be  $n$ -by- $n$  matrices, and*

$$Z = \begin{pmatrix} P & R \\ R' & Q \end{pmatrix}. \quad (122)$$

*Suppose  $Z \succeq \mathbf{0}$  and  $\text{rank}(Z) = 2n - 1$ . Denote  $r = \text{rank}(P)$  and  $s = \text{rank}(Q)$ . Then  $r + s \in \{2n - 1, 2n\}$ .*

*Proof:* Let  $\text{Ker}(P)$  be spanned by  $\mathbf{u}_1, \dots, \mathbf{u}_{n-r}$ , and  $\text{Ker}(Q)$  be spanned by  $\mathbf{v}_1, \dots, \mathbf{v}_{n-s}$ . Denote  $\hat{\mathbf{u}}_i = \begin{pmatrix} \mathbf{u}_i \\ \mathbf{0} \end{pmatrix}$  and  $\hat{\mathbf{v}}_i = \begin{pmatrix} \mathbf{0} \\ \mathbf{v}_i \end{pmatrix}$ . Then

$$\hat{\mathbf{u}}_i' Z \hat{\mathbf{u}}_i = \mathbf{u}_i' P \mathbf{u}_i = 0. \quad (123)$$

Since  $Z \succeq \mathbf{0}$ , so  $\hat{\mathbf{u}}_i \in \text{Ker}(Z)$ . Similarly  $\hat{\mathbf{v}}_i \in \text{Ker}(Z)$ . Clearly  $\hat{\mathbf{u}}_1, \dots, \hat{\mathbf{u}}_{n-r}, \hat{\mathbf{v}}_1, \dots, \hat{\mathbf{v}}_{n-s}$  are linearly independent, therefore

$$2n - 1 = \text{rank}(Z) \leq 2n - (n - r) - (n - s) = r + s. \quad (124)$$

So  $r + s \in \{2n - 1, 2n\}$ . ■

## Auxiliary References

- [35] Y. Nesterov. Smooth minimization of non-smooth functions. *Mathematical Programming*, 103:127–152, 2005.
- [36] F. Bach, J. Mairal, and J. Ponce. Convex sparse matrix factorizations. arXiv:0812.1869v1, 2008.
- [37] W. Ai and S. Zhang. Strong duality for the CDT subproblem: A necessary and sufficient condition. *SIAM Journal on Optimization*, 19:1735–1756, 2009.
- [38] G. Pataki. On the rank of extreme matrices in semidefinite programs and the multiplicity of optimal eigenvalues. *Math. Oper. Res.*, 23(2):339–358, 1998.
- [39] R. A. Horn and C. R. Johnson. *Matrix Analysis*. Cambridge University Press, Cambridge, 1985.
- [40] G. H. Golub and V. Pereyra. The differentiation of pseudo-inverses and nonlinear least squares problems whose variables separate. *SIAM Journal on Numerical Analysis*, 10(2):413–432, 1973.
- [41] J. R. Magnus. On differentiating eigenvalues and eigenvectors. *Econometric Theory*, 1(2): 179–191, 1985.
- [42] J. Sturm and S. Zhang. On cones of nonnegative quadratic functions. *Mathematics of Operations Research*, 28:246–267, 2003.
